# Supplementary material for: Effects of Rosemary Extract on C2C12 Myoblast Differentiation and 5-Aminoimidazole-4-carboxamide Ribonucleoside (AICAR)-Induced Muscle Cell Atrophy
Source: MDPI journal article supplement (doi:10.3390/app13020986), 2023-01-11
Supplement: s1 [file s1]

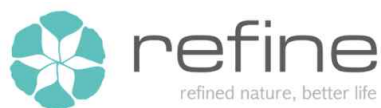

## Beijing Refine Biology Co.,Ltd

Add:Room 308/311, D3 BuildingDongsheng Science&Technology Park,  
NO.66,Xixiaokou Road, Haidian District, Beijing 100192.China.

TEL:86-10-82156001

FAX:86-10-82156032

Email:Saleshh@refinebiology.com <http://www.refinebiology.com>

### Certificate of Analysis

|                  |                               |                    |               |
|------------------|-------------------------------|--------------------|---------------|
| Product Name     | Rosemary Extract              | Batch No.          | RfMDX20161213 |
| Botanical Source | <i>Rosmarinus officinalis</i> | Manufacturing Date | 2016-12-13    |
| Plant Part       | Leaf                          | Issue Date         | 2016-12-20    |
| Batch Quantity   | 500kg/20drums                 | Expiration Date    | 2018-12-12    |

| Item                     | Specification                          | Result   | Method                  |
|--------------------------|----------------------------------------|----------|-------------------------|
| <b>Assay</b>             | Ursolic Acid $\geq$ 25.0%              | 25.31%   | HPLC                    |
| <b>Organoleptic</b>      |                                        |          |                         |
| Appearance               | Light yellow to greenish yellow powder | Conforms | Visual                  |
| Country of harvesting    | China                                  | Conforms |                         |
| Extract solvent          | Ethanol & Water                        | Conforms |                         |
| Odor                     | Characteristic                         | Conforms | Organoleptic            |
| Taste                    | Characteristic                         | Conforms | Organoleptic            |
| <b>Physical</b>          |                                        |          |                         |
| Particle Size            | NLT95%Through 80 mesh                  | Conforms | USP32<786>              |
| Loss on Drying           | $\leq$ 5.0%                            | 3.07%    | Eur.Ph.6.0[2.8.17]      |
| Ash content              | $\leq$ 3.0%                            | 1.12%    | Eur.Ph.6.0[2.4.16]      |
| <b>Pesticide Residue</b> |                                        |          |                         |
| Total Heavy Metals       | $\leq$ 10ppm                           | Conforms | Eur.Ph.6.0<2.2.58>ICP-M |
| Arsenic(As)              | $\leq$ 2ppm                            | Conforms | Eur.Ph.6.0<2.2.58>ICP-M |
| Lead(Pb)                 | $\leq$ 1ppm                            | Conforms | Eur.Ph.6.0<2.2.58>ICP-M |
| Mercury(Hg)              | $\leq$ 0.1ppm                          | Conforms | Eur.Ph.6.0<2.2.58>ICP-M |
| <b>Microbiological</b>   |                                        |          |                         |
| Total Plate Count        | $\leq$ 1000cfu/g                       | Conforms | USP32<61>               |
| Total Yeast & Mold       | $\leq$ 100cfu/g                        | Conforms | USP32<61>               |
| E.Coli                   | Negative                               | Negative | USP32<62>               |
| Salmonella               | Negative                               | Negative | USP32<62>               |
| Staphylococcus           | Negative                               | Negative | USP32<62>               |

Storage Store in a cool place fully protected from sun light

Shelf Life 24 months if sealed and stored properly.

Tested by: Mr Wang

Date: 2016-12-20
